# Supplementary material
Source: ML conference proceedings conference paper supplement (https://openaccess.thecvf.com/content/ICCV2021/html/Li_Sat2Vid_Street-View_Panoramic_ICCV_2021_paper.html)
Supplement: Supplementary file 1 [file Li_Sat2Vid_Street-View_Panoramic_ICCV_2021_supplemental.zip]

Archive with 3 entries (3 files):
- 02469-supp/02469-main.pdf
- 02469-supp/02469-supp.pdf
- 02469-supp/README.txt
