# Supplementary material
Source: ML conference proceedings conference paper supplement (https://openaccess.thecvf.com/content/ICCV2021/html/Li_Sat2Vid_Street-View_Panoramic_ICCV_2021_paper.html)
Supplement: Supplementary file 1 [file Li_Sat2Vid_Street-View_Panoramic_ICCV_2021_supplemental.zip › 02469-supp/README.txt]

Our supplementary materials contain two files, i.e., "02469-supp.pdf" and "02469-main.pdf". The former one provides the detail of our network architecture and additional quantitative/qualitative experiment results, while the latter one is the same as our main paper while maintaining the figure animations with higher resolution.
